# Supplementary material for: Use of the Modified Checklist for Autism, Revised with Follow Up-Albanian to Screen for ASD in Albania
Source: Springer Nature journal article supplement (doi:10.1007/s10803-016-2875-5), 2016-08-03
Supplement: MOESM1 [file 10560494]

Supplemental Materials

Evaluation Data by Case

|  |  | 2 Stage Screening Total Scores | |  | ADOS Total Scores | | | | |  | PEDS Totals | |  | PED-DM: Percent of Delay | | | | | |
| --- | --- | --- | --- | --- | --- | --- | --- | --- | --- | --- | --- | --- | --- | --- | --- | --- | --- | --- | --- |
| Client | ADOS Class | M-CHAT-R-A | M-CHAT-R/F-A |  | Comm | RSI | Comm  & RSI | Play | RRBs |  | Pred concerns | Non-pred concerns |  | Fine  Motor | Self  Help | Recep  Lang | Exp Lang | Gross  Motor | Social  Emot |
| 1 | Non-ASD | 11 | 8 |  | 5 | 2 | 7 | 2 | 0 |  | 3 | 4 |  | 54% | 58% | 19% | 42% | -4% | 42% |
| 2 | Autism | 6 | 6 |  | 5 | 13 | 18 | 4 | 0 |  | 2 | 2 |  | 45% | 41% | 5% | 45% | 32% | 32% |
| 3 | Autism | 11 | 11 |  | 6 | 13 | 19 | 4 | 3 |  | 3 | 3 |  | -4% | 30% | 74% | 48% | -4% | 48% |
| 4 | Autism | 12 | 11 |  | 6 | 14 | 20 | 4 | 4 |  | 3 | 3 |  | 71% | 62% | 100% | 62% | 71% | 67% |
| 5 | ASD | 7 | 6 |  | 4 | 6 | 10 | 3 | 5 |  | 2 | 3 |  | 0% | 8% | 38% | 0% | -29% | 13% |
| 6 | ASD | 14 | 10 |  | 3 | 12 | 15 | 4 | 4 |  | 2 | 3 |  | 35% | 74% | 83% | 61% | 35% | 61% |
| 7 | Autism | 8 | 5 |  | 6 | 13 | 19 | 4 | 4 |  | 2 | 1 |  | 56% | 48% | 74% | 85% | 0% | 48% |
| 8 | Autism | 10 | 11 |  | 4 | 14 | 18 | 3 | 4 |  | 2 | 5 |  | 33% | 31% | 75% | 58% | 14% | 75% |
| 9 | Autism | 13 | 15 |  | 8 | 10 | 18 | 4 | 1 |  | 4 | 5 |  | 33% | 41% | 78% | 56% | 44% | 67% |
| 10 | Non-ASD | 8 | 4 |  | 2 | 4 | 6 | 4 | 2 |  | 3 | 3 |  | 25% | 25% | 75% | 67% | 14% | 28% |
| 11 | Autism | 14 | 11 |  | 7 | 12 | 19 | 4 | 4 |  | 3 | 3 |  | 38% | 42% | 83% | 71% | 25% | 46% |
| 12 | Autism | 7 | 10 |  | 6 | 8 | 14 | 4 | 4 |  | 3 | 4 |  | 33% | 39% | 75% | 58% | 31% | 58% |
| 13 | Autism | 18 | 5 |  | 4 | 12 | 16 | 4 | 0 |  | 3 | 3 |  | 66% | 54% | 74% | 66% | 29% | 51% |
| 14 | Autism | 6 | 6 |  | 6 | 14 | 20 | 4 | 1 |  | 2 | 0 |  | 10% | 30% | 40% | 40% | 25% | 10% |
| 15 | Autism | 15 | 12 |  | 4 | 13 | 17 | 4 | 2 |  | 3 | 3 |  | 65% | 53% | 82% | 65% | 44% | 82% |
| 16 | Autism | 13 | 12 |  | 4 | 14 | 18 | 4 | 2 |  | 3 | 2 |  | 65% | 53% | 82% | 65% | 26% | 82% |
| 17 | ASD | 19 | 3 |  | 4 | 5 | 9 | 4 | 1 |  | 3 | 2 |  | 12% | 53% | 74% | 65% | 9% | 74% |
| 18 | Autism | 16 | 15 |  | 5 | 9 | 14 | 1 | 0 |  | 3 | 0 |  | 4% | 36% | 76% | 52% | 4% | 40% |
| 19 | Autism | 10 | 7 |  | 8 | 8 | 16 | 3 | 0 |  | 3 | 1 |  | 11% | 63% | 22% | 56% | 0% | 44% |
| 20 | No ADOS | 14 | 8 |  | n/a | n/a | n/a | n/a | n/a |  | 2 | 0 |  | 0% | 19% | 72% | 53% | 3% | 19% |
| Average (SD) | |  |  |  | 5.11 (1.59) | 10.32 (3.80) | 15.42 (4.38) | 3.58 (0.84) | 2.16 (1.77) |  | 2.70 (0.57) | 2.5 (1.50) |  | 32.56% | 42.95% (16.30%) | 65.03% (25.53%) | 55.69% (16.79%) | 18.43% (22.39%) | 49.33% (21.80%) |
